# Supplementary material
Source: PubMed Central journal article supplement (PMC4106487)

# Supplemental Figure 1.

A.

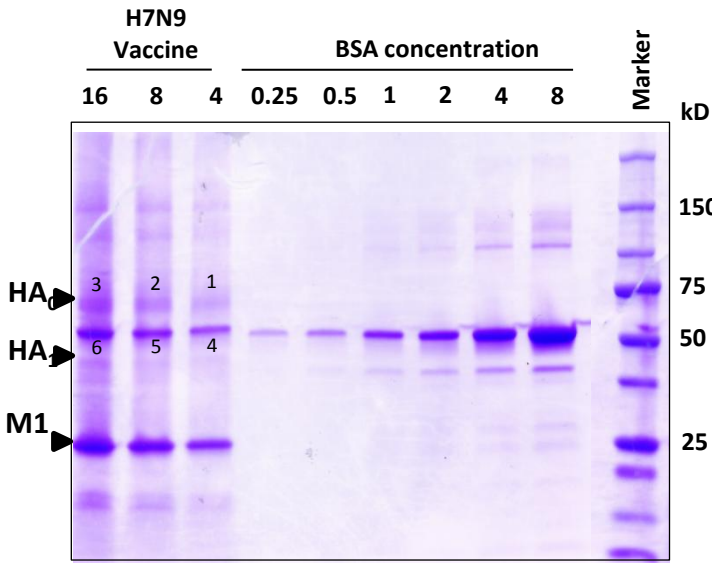

B.

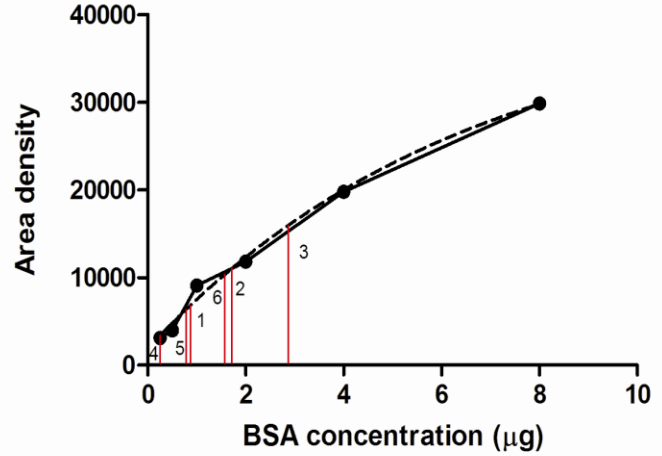

| Total protein loaded (µg) | Band No. | Area Density | Estimated Concentration (µg) | Total HA (µg) (% of total protein) |
|---------------------------|----------|--------------|------------------------------|------------------------------------|
| 4                         | 1        | 6825.154     | 0.8741114                    | 1.131 (28.3)                       |
|                           | 4        | 3392.669     | 0.257531                     |                                    |
| 8                         | 2        | 11036.69     | 1.720592                     | 2.501 (31.3)                       |
|                           | 5        | 6325.447     | 0.7806243                    |                                    |
| 16                        | 3        | 15941.74     | 2.869634                     | 4.44 (27.8)                        |
|                           | 6        | 10352.569    | 1.575358                     |                                    |

Supplemental Figure 2

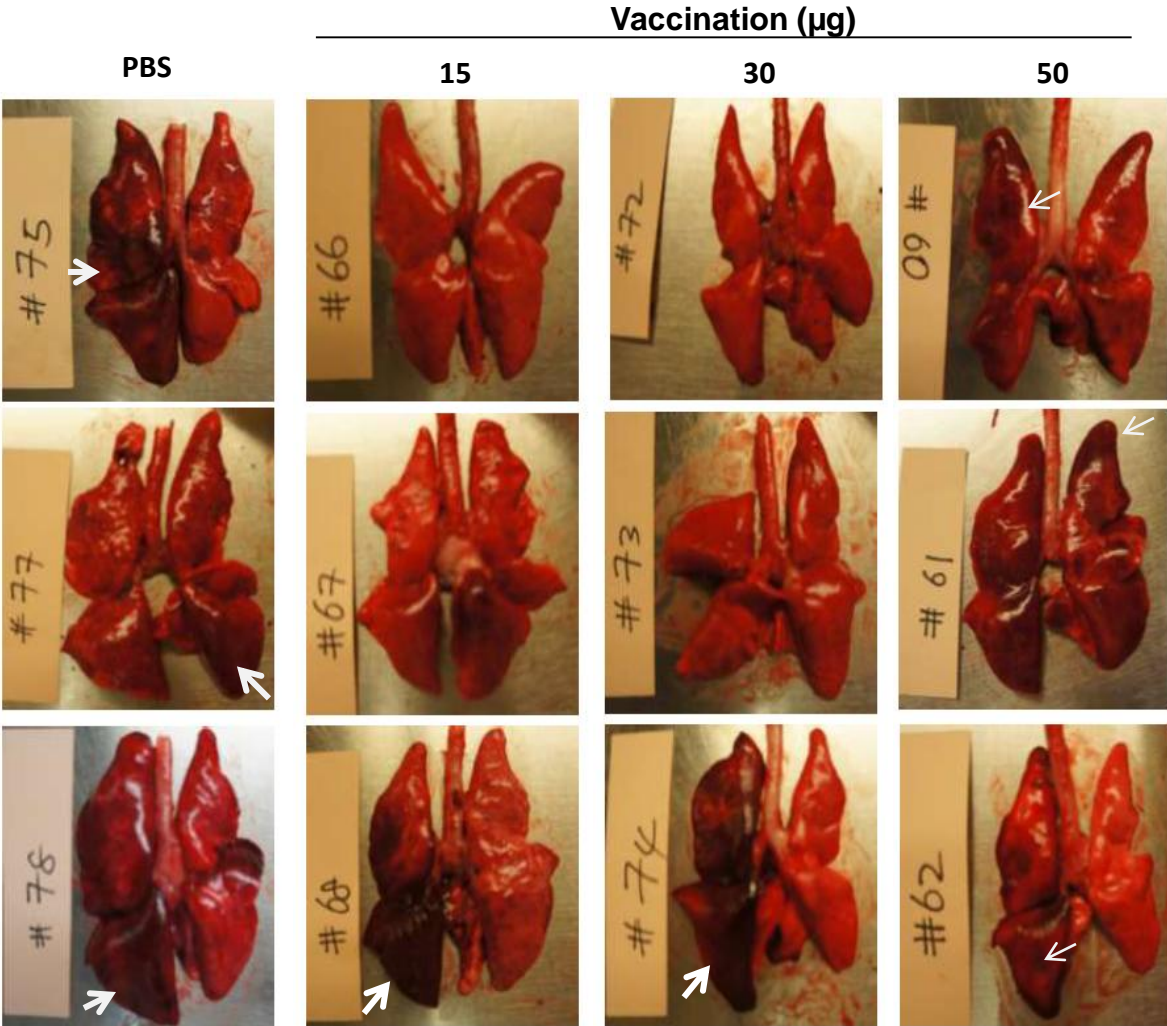

Supplement: NIHMS611427-supplement-01.pdf [file NIHMS611427-supplement-01.pdf]
